# Supplementary material for: A new compound that extends the lifespan of worms, with favorable in vitro properties and a lack of toxicity in rodents
Source: Royal Society of Chemistry journal article supplement (doi:10.1039/d5md00780a), 2025-12-09
Supplement: d5md00780a1.pdf [file d5md00780a1.pdf]

## Supplementary Figures

### **Supplementary Figure 1. Protein binding of MPOL\_B\_1 in human and mouse plasma.**

Scatter plot of the fraction unbound of MPOL\_B\_1 (2  $\mu$ M) and Warfarin (2  $\mu$ M) in both human and mouse (CD1) plasma. The y-axis represents the fraction unbound. Each data point is from an individual measurement. Warfarin serves as a reference compound with known protein binding properties.

### **Supplementary Figure 2. LogD measurements of MPOL\_B\_1 and reference compounds.**

Scatter plot showing the LogD (distribution coefficient) of MPOL\_B\_1 compared to several reference compounds: Warfarin, Chlorpromazine, Atenolol, and Pemetrexed. The y-axis is the LogD value, which is a measure of the compound's lipophilicity (see Materials and Methods). The x-axis lists the compounds tested. Each data point indicates an individual measurement.

**Supplementary Figure 3. *In vitro* stability of MPOL\_B\_1 in human and mouse plasma and liver microsomes.** Panel of scatter plots showing the *in vitro* stability of the compound MPOL\_B\_1 and two reference compounds, propantheline and Verapamil. The stability was assessed in four different matrices: mouse (CD1) liver microsomes, mouse (CD1) plasma, human liver microsomes, and human plasma. The natural logarithm of the percent remaining of the compound over time ( $\ln(\% \text{Remaining})$ ) is on the y-axis, while the x-axis represents the incubation time in h.

**Supplementary Figure 4. Bidirectional permeability of MPOL\_B\_1 in Caco-2 Cells.** Scatter plots displaying the apparent permeability ( $P_{app}$ ) of MPOL\_B\_1 and several reference compounds. The y-axis represents the apparent permeability in units of  $10^{-6}$  cm/s. The x-axis shows the different compounds and their concentrations. The data is divided into two panels: A2B (apical to basolateral) representing absorption, and B2A (basolateral to apical) representing efflux. The A2B panel includes MPOL\_B\_1 (10  $\mu$ M), Warfarin (10  $\mu$ M), Ranitidine

(10  $\mu\text{M}$ ), and Talinolol (10  $\mu\text{M}$ ), as well as a co-incubation of Talinolol (10  $\mu\text{M}$ ) with Verapamil (25  $\mu\text{M}$ ) to assess potential efflux transporter inhibition. The B2A panel includes the same set of compounds and concentrations.

**Supplementary Figure 5. In vitro cytochrome P450 (CYP) inhibition by MPOL\_B\_1 and reference inhibitors.** The y-axis on the scatter plots lists the CYP substrates, with the corresponding enzyme in parentheses. The x-axis represents the percent inhibition (see Materials and Methods). The plot is divided into six sub-panels, each showing the inhibitory effect of a different compound at a specific concentration, as indicated. Each data point represents the inhibition of a particular CYP enzyme by the respective inhibitor.

**Supplementary Figure 6. Cytotoxicity of MPOL\_B\_1 in HepG2 cells.** Scatter plots displaying the *in vitro* cytotoxicity of MPOL\_B\_1 and the reference compound Terfenadine in human liver carcinoma (HepG2) cells. The percent cytotoxicity (see Materials and Methods) is on the y-axis, while the concentration of the compounds (in  $\mu\text{M}$ ) is on the x-axis. Each data point represents the cytotoxicity measured at the indicated concentration.

Supplementary Figure 1

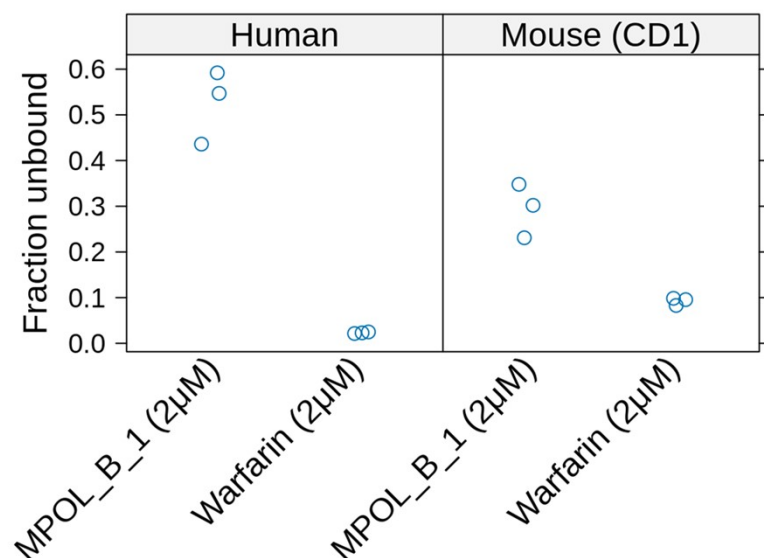

Supplementary Figure 2

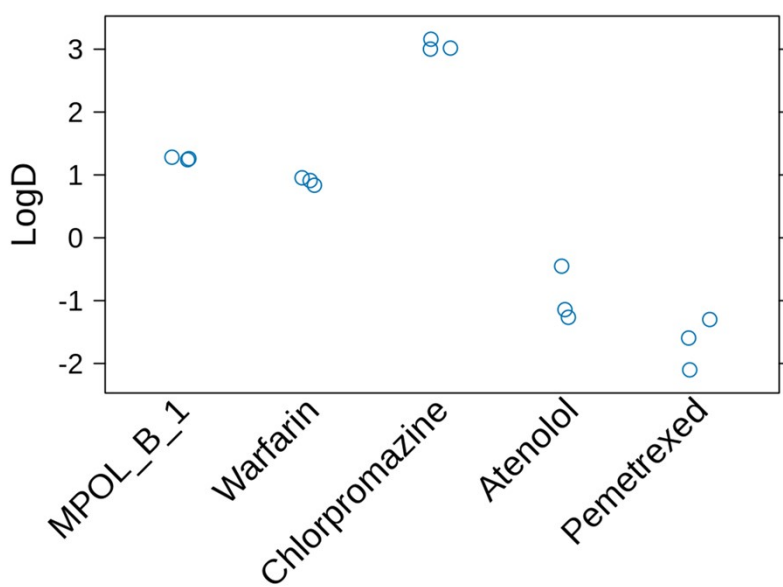

Supplementary Figure 3

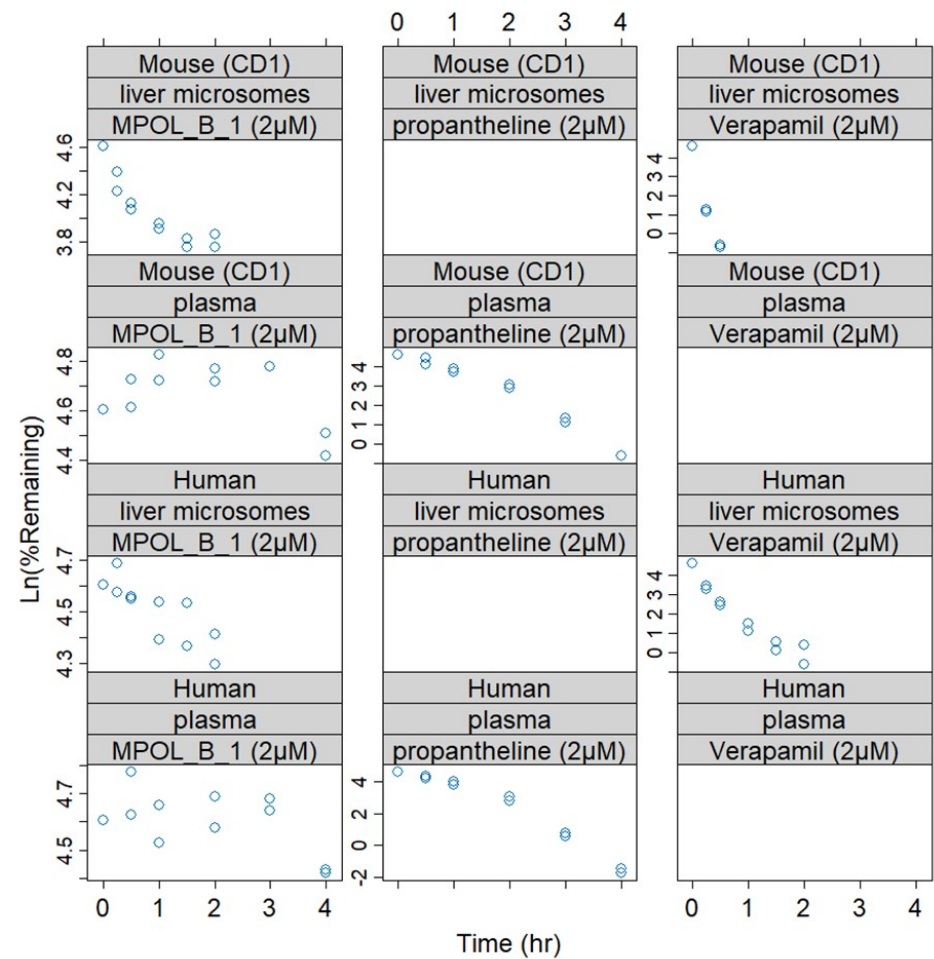

Supplementary Figure 4

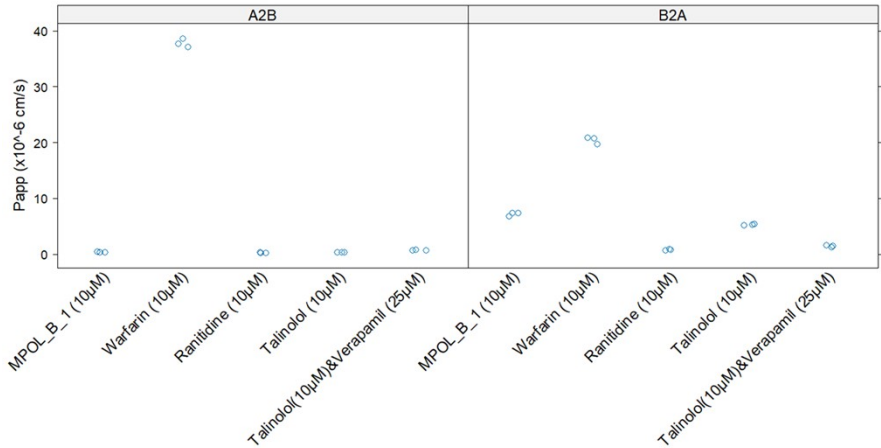

Supplementary Figure 5

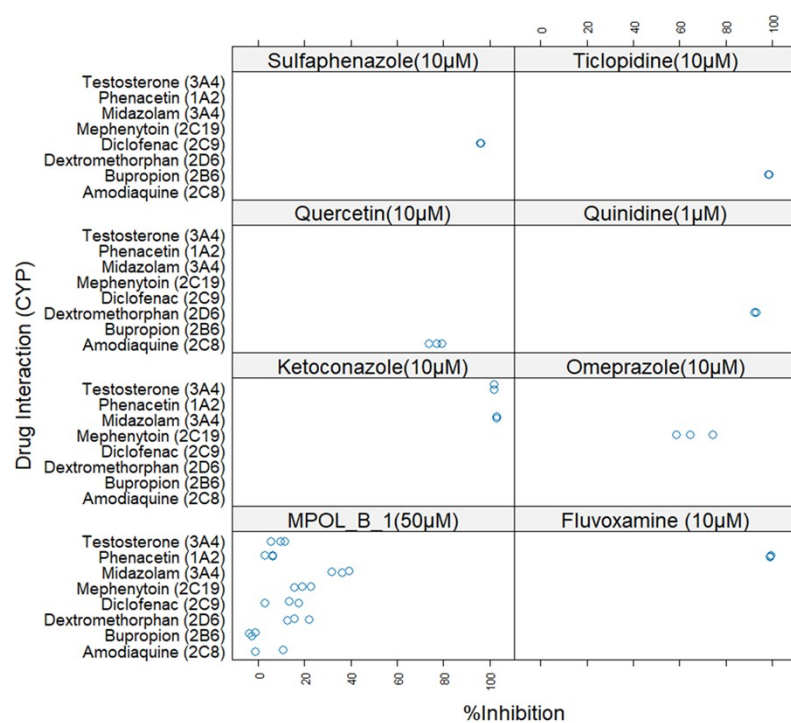

Supplementary Figure 6

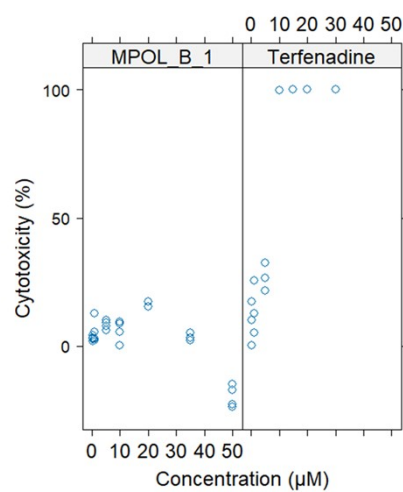

Supplementary Table 1. Effects of MPOL\_B\_1 on hERG ion channel current

| Compound | IC <sub>50</sub> (µM) | Conc (µM) | Mean % hERG Inhibition | Standard Deviation | Standard Error | n | Individual Data Points (% Inhibition) |
|----------|-----------------------|-----------|------------------------|--------------------|----------------|---|---------------------------------------|
| MPOL_B_1 | 86.997                | 0.1       | 2.6                    | 7.9                | 4.6            | 3 | 11.6                                  |



Supplementary Table 2. Results of Ames test without metabolic activation

| Strain | Treatment | Final Conc.<br>(µg/plate) | Mean<br>Revertant<br>s Per<br>Plate | Standar<br>d<br>Deviation | Fold<br>Response | Revertant Counts<br>Per Plate |
|--------|-----------|---------------------------|-------------------------------------|---------------------------|------------------|-------------------------------|
| TA100  | DMSO      | -                         | 89.0                                | 5.7                       | -                | 85 N NP, 93 N NP              |
|        | MPOL_B_1  | 1.58                      | 93.5                                | 14.8                      | 1.1              | 83, 104                       |
|        |           | 5.0                       | 92.5                                | 6.4                       | 1.0              | 97, 88                        |
|        |           | 15.8                      | 88.0                                | 9.9                       | 1.0              | 81, 95                        |
|        |           | 50                        | 94.0                                | 12.7                      | 1.1              | 103, 85                       |
|        |           | 158                       | 93.0                                | 1.4                       | 1.0              | 94, 92                        |
|        |           | 500                       | 103.5                               | 2.1                       | 1.2              | 105, 102                      |
|        |           | 1581                      | 102.0                               | 7.1                       | 1.1              | 97, 107                       |
|        |           | 5000                      | 90.0                                | 2.8                       | 1.0              | 88 N NP, 92 N NP              |
|        | NaAz      | 0.5                       | 408.5 +                             | 38.9                      | 4.6              | 381, 436                      |
| TA1535 | DMSO      | -                         | 25.0                                | 15.6                      | -                | 14 N NP, 36 N NP              |
|        | MPOL_B_1  | 1.58                      | 26.5 <sup>a</sup>                   | 4.9                       | 1.1              | 23, 30                        |
|        |           | 5.0                       | 12.0 L                              | 4.2                       | 0.5              | 15, 9                         |
|        |           | 15.8                      | 14.5                                | 0.7                       | 0.6              | 14, 15                        |
|        |           | 50                        | 12.5 L                              | 0.7                       | 0.5              | 12, 13                        |
|        |           | 158                       | 25.0                                | 8.5                       | 1.0              | 31, 19                        |
|        |           | 500                       | 18.5                                | 4.9                       | 0.7              | 15, 22                        |
|        |           | 1581                      | 17.0                                | 0.0                       | 0.7              | 17, 17                        |
|        |           | 5000                      | 19.0                                | 0.0                       | 0.8              | 19 N NP, 19 N NP              |
|        | NaAz      | 0.5                       | 440.0 +                             | 43.8                      | 17.6             | 409, 471                      |
| TA1537 | DMSO      | -                         | 11.0                                | 2.8                       | -                | 9 N NP, 13 N NP               |
|        | MPOL_B_1  | 1.58                      | 12.5                                | 0.7                       | 1.1              | 12, 13                        |
|        |           | 5.0                       | 10.5                                | 2.1                       | 1.0              | 9, 12                         |
|        |           | 15.8                      | 14.0                                | 7.1                       | 1.3              | 9, 19                         |
|        |           | 50                        | 14.0                                | 2.8                       | 1.3              | 12, 16                        |
|        |           | 158                       | 7.5                                 | 3.5                       | 0.7              | 5, 10                         |
|        |           | 500                       | 13.0                                | 1.4                       | 1.2              | 12, 14                        |
|        |           | 1581                      | 10.5                                | 3.5                       | 1.0              | 8, 13                         |
|        |           | 5000                      | 19.5                                | 6.4                       | 1.8              | 15 N NP, 24 N NP              |
|        | 9AC       | 50                        | 255.0 +                             | 49.5                      | 23.2             | 220, 290                      |

| Strain      | Treatment | Final Conc.<br>(µg/plate) | Mean<br>Revertant<br>s Per<br>Plate | Standar<br>d<br>Deviation | Fold<br>Response | Revertant Counts<br>Per Plate |
|-------------|-----------|---------------------------|-------------------------------------|---------------------------|------------------|-------------------------------|
| TA98        | DMSO      | -                         | 29.5                                | 3.5                       | -                | 27 N NP, 32 N NP              |
|             | MPOL_B_1  | 1.58                      | 41.0 <sup>a</sup>                   | 1.4                       | 1.4              | 40 CNOC,<br>42 CNOC           |
|             |           | 5.0                       | 32.5                                | 4.9                       | 1.1              | 36 CNOC,<br>29 CNOC           |
|             |           | 15.8                      | 27.0                                | 0.0                       | 0.9              | 27 CNOC,<br>27 CNOC           |
|             |           | 50                        | 25.5                                | 2.1                       | 0.9              | 24 CNOC,<br>27 CNOC           |
|             |           | 158                       | 25.5                                | 3.5                       | 0.9              | 28 CNOC,<br>23 CNOC           |
|             |           | 500                       | 36.5                                | 0.7                       | 1.2              | 36 CNOC,<br>37 CNOC           |
|             |           | 1581                      | 42.5 <sup>a</sup>                   | 17.7                      | 1.4              | 30 CNOC,<br>55 CNOC           |
|             |           | 5000                      | 30.5                                | 4.9                       | 1.0              | 27 CNOC N NP,<br>34 CNOC N NP |
|             | 2NF       | 1                         | 193.0 +                             | 2.8                       | 6.5              | 195, 191                      |
| WP2<br>uvrA | DMSO      | -                         | 23.5                                | 2.1                       | -                | 22 N NP, 25 N NP              |
|             | MPOL_B_1  | 1.58                      | 23.5                                | 0.7                       | 1.0              | 23, 24                        |
|             |           | 5.0                       | 21.5                                | 7.8                       | 0.9              | 27, 16                        |
|             |           | 15.8                      | 18.5                                | 4.9                       | 0.8              | 22, 15                        |
|             |           | 50                        | 23.0                                | 8.5                       | 1.0              | 17, 29                        |
|             |           | 158                       | 26.0                                | 5.7                       | 1.1              | 22, 30                        |
|             |           | 500                       | 20.5                                | 2.1                       | 0.9              | 19, 22                        |
|             |           | 1581                      | 31.0                                | 4.2                       | 1.3              | 28, 34                        |
|             |           | 5000                      | 20.5                                | 4.9                       | 0.9              | 24 N NP, 17 N NP              |
|             | NQO       | 0.5                       | 145.5 +                             | 47.4                      | 6.2              | 179, 112                      |

## Vehicles &amp; Positive Controls

## Observations

|      |                             |              |                                                                                                                                                                                       |
|------|-----------------------------|--------------|---------------------------------------------------------------------------------------------------------------------------------------------------------------------------------------|
| DMSO | Dimethyl sulfoxide          | CNOC         | Contamination did not obscure count                                                                                                                                                   |
| 2NF  | 2-Nitrofluorene             | N            | normal background lawn                                                                                                                                                                |
| 9AC  | 9-Aminoacridine Hemihydrate | NP           | no precipitate                                                                                                                                                                        |
| NQO  | 4-Nitroquinoline N-oxide    | +            | Substantially higher ( $\geq 2$ -fold for TA98, TA100, WP2uvrA, and $\geq 3$ -fold for TA1535, TA1537) than the mean number of revertant colonies for its respective negative control |
| NaAz | Sodium azide                | L            | Low count considered due to normal variation rather than toxicity since not clearly dose-related and not outside normal limits based on historical negative control values            |
|      |                             | <sup>a</sup> | Revertant colony counts above the 95% tolerance limits of the negative historical control data                                                                                        |





Supplementary Table 3. Results of Ames test with metabolic activation

| Strain | Treatment | Final Conc. (µg/plate) | Mean Revertants Per Plate | Standard Deviation | Fold Response | Revertant Counts Per Plate |
|--------|-----------|------------------------|---------------------------|--------------------|---------------|----------------------------|
| TA100  | DMSO      | -                      | 119.0                     | 5.7                | -             | 115 N NP, 123 N NP         |
|        | MPOL_B_1  | 1.58                   | 113.0                     | 5.7                | 0.9           | 109, 117                   |
|        |           | 5.0                    | 112.0                     | 2.8                | 0.9           | 110, 114                   |
|        |           | 15.8                   | 118.5                     | 9.2                | 1.0           | 112, 125                   |
|        |           | 50                     | 108.5                     | 29.0               | 0.9           | 88, 129                    |
|        |           | 158                    | 108.5                     | 12.0               | 0.9           | 100, 117                   |
|        |           | 500                    | 116.0                     | 8.5                | 1.0           | 110, 122                   |
|        |           | 1581                   | 107.0                     | 2.8                | 0.9           | 105, 109                   |
|        |           | 5000                   | 112.0                     | 21.2               | 0.9           | 97 N NP, 127 N NP          |
|        | BaP       | 5                      | 533.0 +                   | 41.0               | 4.5           | 562, 504                   |
| TA1535 | DMSO      | -                      | 14.0                      | 1.4                | -             | 13 N NP, 15 N NP           |
|        | MPOL_B_1  | 1.58                   | 15.5                      | 2.1                | 1.1           | 14, 17                     |
|        |           | 5.0                    | 15.0                      | 1.4                | 1.1           | 16, 14                     |
|        |           | 15.8                   | 22.0 <sup>a</sup>         | 2.8                | 1.6           | 24, 20                     |
|        |           | 50                     | 16.5                      | 10.6               | 1.2           | 9, 24                      |
|        |           | 158                    | 8.5                       | 2.1                | 0.6           | 10, 7                      |
|        |           | 500                    | 22.0 <sup>a</sup>         | 2.8                | 1.6           | 20, 24                     |
|        |           | 1581                   | 15.5                      | 2.1                | 1.1           | 14, 17                     |
|        |           | 5000                   | 15.5                      | 9.2                | 1.1           | 9 N NP, 22 N NP            |
|        | 2AA       | 5                      | 355.5 +                   | 20.5               | 25.4          | 341, 370                   |
| TA1537 | DMSO      | -                      | 12.5                      | 6.4                | -             | 8 N NP, 17 N NP            |
|        | MPOL_B_1  | 1.58                   | 29.0 <sup>a</sup>         | 8.5                | 2.3           | 35, 23                     |
|        |           | 5.0                    | 20.0                      | 1.4                | 1.6           | 19, 21                     |
|        |           | 15.8                   | 17.0                      | 4.2                | 1.4           | 14, 20                     |
|        |           | 50                     | 16.5                      | 4.9                | 1.3           | 13, 20                     |
|        |           | 158                    | 15.0                      | 1.4                | 1.2           | 16, 14                     |
|        |           | 500                    | 24.0 <sup>a</sup>         | 0.0                | 1.9           | 24, 24                     |
|        |           | 1581                   | 21.5                      | 0.7                | 1.7           | 21, 22                     |
|        |           | 5000                   | 16.0                      | 4.2                | 1.3           | 13 N NP, 19 N NP           |
|        | 2AA       | 5                      | 355.5 +                   | 12.0               | 28.4          | 364, 347                   |

| Strain   | Treatment | Final Conc. (µg/plate) | Mean Revertant s Per Plate | Standard Deviation | Fold Response | Revertant Counts Per Plate |
|----------|-----------|------------------------|----------------------------|--------------------|---------------|----------------------------|
| TA98     | DMSO      | -                      | 40.5                       | 6.4                | -             | 36 N NP, 45 N NP           |
|          | MPOL_B_1  | 1.58                   | 48.0 <sup>a</sup>          | 0.0                | 1.2           | 48, 48                     |
|          |           | 5.0                    | 33.5                       | 3.5                | 0.8           | 36, 31                     |
|          |           | 15.8                   | 40.0                       | 1.4                | 1.0           | 39, 41                     |
|          |           | 50                     | 43.0                       | 11.3               | 1.1           | 35, 51                     |
|          |           | 158                    | 39.5                       | 3.5                | 1.0           | 42, 37                     |
|          |           | 500                    | 42.5                       | 16.3               | 1.0           | 31, 54                     |
|          |           | 1581                   | 37.0                       | 11.3               | 0.9           | 29, 45                     |
|          |           | 5000                   | 45.5                       | 3.5                | 1.1           | 43 N NP, 48 N NP           |
|          | BaP       | 5                      | 175.0 +                    | 17.0               | 4.3           | 163, 187                   |
| WP2 uvrA | DMSO      | -                      | 33.0                       | 1.4                | -             | 32 N NP, 34 N NP           |
|          | MPOL_B_1  | 1.58                   | 27.5                       | 6.4                | 0.8           | 23, 32                     |
|          |           | 5.0                    | 41.0                       | 5.7                | 1.2           | 37, 45                     |
|          |           | 15.8                   | 31.0                       | 4.2                | 0.9           | 28, 34                     |
|          |           | 50                     | 42.5                       | 2.1                | 1.3           | 41, 44                     |
|          |           | 158                    | 26.0                       | 2.8                | 0.8           | 24, 28                     |
|          |           | 500                    | 38.0                       | 5.7                | 1.2           | 34, 42                     |
|          |           | 1581                   | 31.0                       | 4.2                | 0.9           | 28, 34                     |
|          |           | 5000                   | 34.5                       | 9.2                | 1.0           | 28 N NP, 41 N NP           |
|          | 2AA       | 20                     | 181.0 +                    | 11.3               | 5.5           | 189, 173                   |

| Vehicles & Positive Controls |                                  | Observations |                                                                                                                                                                                       |
|------------------------------|----------------------------------|--------------|---------------------------------------------------------------------------------------------------------------------------------------------------------------------------------------|
| DMSO                         | Dimethyl sulfoxide               | N            | normal background lawn                                                                                                                                                                |
| 2AA                          | 2-Aminoanthracene (2-Anthramine) | NP           | no precipitate                                                                                                                                                                        |
| BaP                          | Benzo(a)pyrene                   | +            | Substantially higher ( $\geq 2$ -fold for TA98, TA100, WP2uvra, and $\geq 3$ -fold for TA1535, TA1537) than the mean number of revertant colonies for its respective negative control |
|                              |                                  | <sup>a</sup> | Revertant colony counts above the 95% tolerance limits of the negative historical control data                                                                                        |

*Supplementary Table 4. Lifespan results in worms*

| Treatment   | Dose ( $\mu$ M) | Mean | Median | n   |
|-------------|-----------------|------|--------|-----|
| Mock (DMSO) | NA              | 21.8 | 23     | 86  |
| MPOL_B_1    | 100             | 28.2 | 29     | 112 |
|             | 50              | 26.5 | 27     | 120 |
|             | 25              | 20.8 | 19     | 123 |
|             | 12.5            | 19.5 | 19     | 116 |
|             | 6.25            | 18.8 | 17     | 140 |
|             | 3.125           | 19.2 | 17     | 111 |
|             | 1.56            | 20.5 | 21     | 125 |
| MPOL_D_1    | 100             | 18.6 | 17     | 95  |
|             | 50              | 21.1 | 21     | 116 |
|             | 25              | 22.3 | 21     | 117 |
|             | 12.5            | 22.5 | 21     | 114 |
|             | 6.25            | 21.2 | 21     | 126 |
|             | 3.125           | 21.2 | 21     | 115 |
|             | 1.56            | 20.7 | 21     | 137 |
