# Supplementary material for: A new compound that extends the lifespan of worms, with favorable in vitro properties and a lack of toxicity in rodents
Source: Royal Society of Chemistry journal article supplement (doi:10.1039/d5md00780a), 2025-12-09
Supplement: d5md00780a3.pdf [file d5md00780a3.pdf]

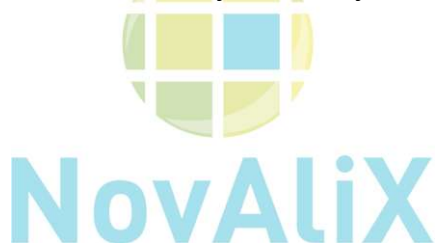

## CERTIFICATE OF ANALYSIS

SHEET 1/3

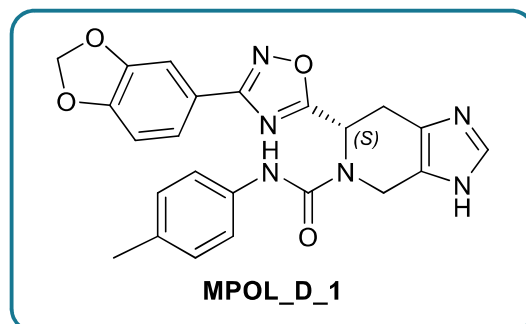

### COMPOUND IDENTITY

|                       |                                                                                                                                  |
|-----------------------|----------------------------------------------------------------------------------------------------------------------------------|
| BATCH IDENTIFIER:     | NNAHDI_0119A                                                                                                                     |
| COMPOUND IDENTIFIERS: | MPOL_D_1                                                                                                                         |
| CHEMICAL NAME:        | (6S)-6-[3-(2H-1,3-benzodioxol-5-yl)-1,2,4-oxadiazol-5-yl]-N-(4-methylphenyl)-3H,4H,5H,6H,7H-imidazo[4,5-c]pyridine-5-carboxamide |
| CAS NUMBER:           | -                                                                                                                                |
| NOVALIX QUOTE:        | NVX230227                                                                                                                        |
| BARCODE:              | -                                                                                                                                |
| PROJECT IDENTIFIER:   | -                                                                                                                                |
| PO NUMBER:            | -                                                                                                                                |

### COMPOUND DESCRIPTORS

|                             |                                                               |
|-----------------------------|---------------------------------------------------------------|
| FREE BASE FORMULA:          | C <sub>23</sub> H <sub>20</sub> N <sub>6</sub> O <sub>4</sub> |
| FREE BASE MOLECULAR WEIGHT: | 444.45 g.mol <sup>-1</sup>                                    |
| SALT FORMULA:               | -                                                             |
| SALT MOLECULAR WEIGHT:      | -                                                             |
| PHYSICAL ASPECT:            | White powder                                                  |
| STABILITY:                  | -                                                             |
| KNOWN SOLUBILITY:           | DMSO, DCM, CDCl <sub>3</sub>                                  |

No toxicity data available. For R&D use only. The information provided in this document is believed to be correct but does not purport to be all inclusive and shall be used only as a guide. This information is based on the present state of our knowledge and is applicable to the product with regard to the appropriate safety precautions.

**COMPOUND ANALYTICAL SPECIFICATIONS**

---

IDENTITY DETERMINATION METHOD(S): MS, <sup>1</sup>H NMR

ACCEPTANCE CRITERIA: in accordance with the expected structure

PURITY DETERMINATION METHOD(S): LCMS, with UV detection @ 220 nm

ACCEPTANCE CRITERIA: &gt; 95.0%

IMPURITY DETERMINATION METHOD(S): nature and content of impurities

ACCEPTANCE CRITERIA:

**COMPOUND ANALYSIS**

---

## LC/MS:

METHOD REFERENCE: AN01\_001\_053

COMPOUND UV AREA: 97.7 %

COLUMN: Poroshell 120 EC-C18

ELUTION GRADIENT<sup>‡</sup>: Water (+0.2 wt % NH<sub>4</sub>HCO<sub>3</sub>) / Acetonitrile: from 98:2 to 0:100

DETECTION: UV (220 nm)

MASS DETECTION: ESI+ &amp; ESI-

EXACT MASS: 444.15

MAIN MASS PEAKS: 445.1 [M+H]<sup>+</sup> / 443.1 [M-H]<sup>-</sup>

NOTES:

<sup>‡</sup>: FA: Formic acid; TFA: Trifluoroacetic acid

## NMR:

<sup>1</sup>H FREQUENCY: 500 MHzSOLVENT 1: DMSO-d<sub>6</sub> SOLVENT 2: -

RESIDUAL SOLVENT (in wt%):

OTHER IMPURITIES: Presence of minor aliphatic impurities

NOTES: *in accordance with expected structure. Presence of rotamers.*<sup>13</sup>C FREQUENCY: N/A

SOLVENT: -

NOTES: N/A.

<sup>1</sup>H QUANTITATIVE NMR<sup>#</sup>: -<sup>#</sup>: as described in *Anal. Chem.* **2014**, 86, 11474-11480 & references herein

No toxicity data available. For R&D use only. The information provided in this document is believed to be correct but does not purport to be all inclusive and shall be used only as a guide. This information is based on the present state of our knowledge and is applicable to the product with regard to the appropriate safety precautions.

## RESULT

---

- ☒ This sample is compliant with requested specifications
- ☐ Within the limits of the analyses performed to date, this sample is compliant with requested specifications. Remaining analyses will be performed at client facilities  
*Comments:*
- ☐ This sample is not compliant with requested specifications  
*Comments: -*

## NOTES

---

CONTACT: Dr. Hajer Abdelkafi  
CHEMIST: Nadia Nahdi

ANALYSIS DATE: 22<sup>th</sup> September 2023  
AMOUNT DELIVERED: 8.00 mg

RETEST DATE: -

REVIEWED BY: Dr. Hajer Abdelkafi

REVIEW DATE: 14<sup>th</sup> November 2023

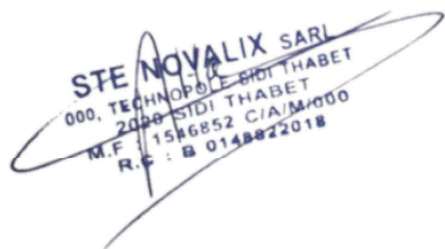

# LCMS NNAHDI\_0119A

**Data file:** C:\Users\Public\Documents\ChemStation\1\Data\2023\09\22-09-23\NNAHDI\_0119A\_3927.D

**Injection date:** 9/22/2023 8:31:26 PM

**Location:** P1-F-05

**Acq. method:** AN01\_001\_053\_pos\_neg.M

**Inj. vol (μL)** 1.000

**Analysis method:** AN01\_001\_053\_pos\_neg.M

**Processing Method:** Process UV, Process MS

**Column name:** Poroshell 120 EC-C18

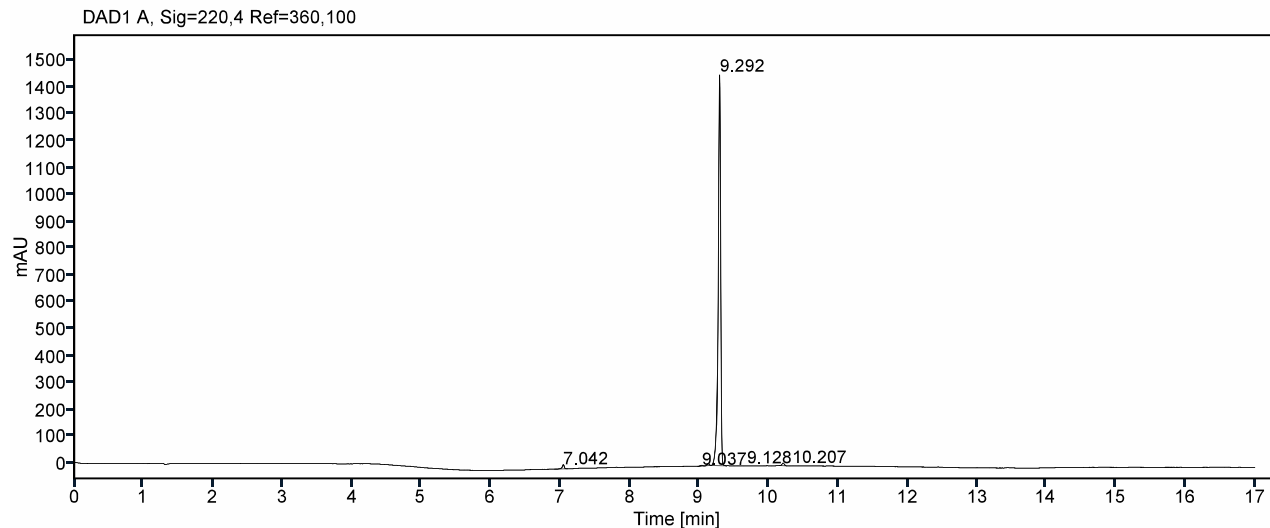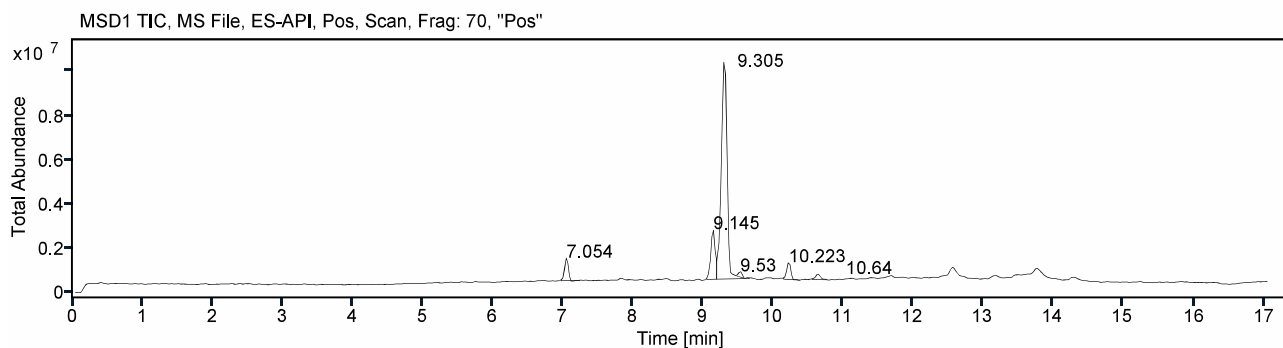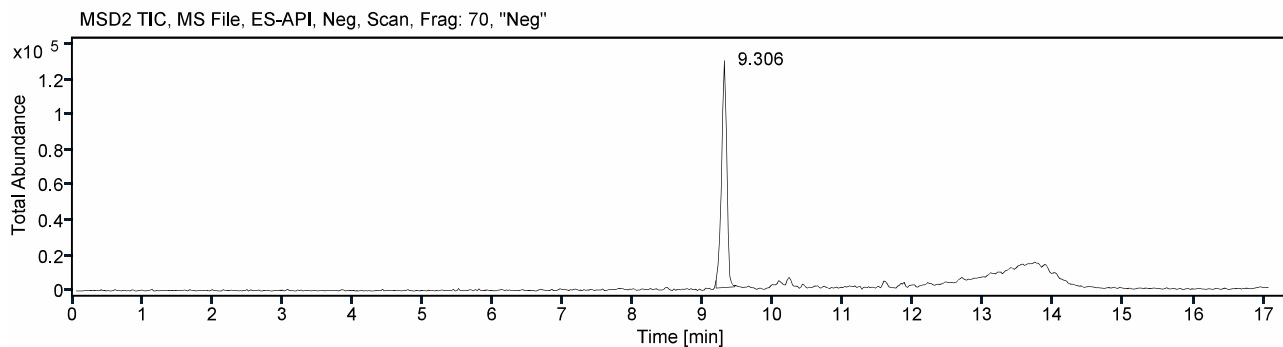

# LCMS NNAHDI\_0119A

Signal: DAD1 A, Sig=220,4 Ref=360,100

|  | <i>Rt min</i> | <i>Area</i> | <i>Height</i> | <i>Area%</i> |
|--|---------------|-------------|---------------|--------------|
|  |               |             |               |              |
|  | 7.04          | 36          | 16            | 1.0          |
|  | 9.04          | 10          | 4             | 0.3          |
|  | 9.13          | 18          | 8             | 0.5          |
|  | 9.29          | 3665        | 1468          | 97.7         |
|  | 10.21         | 24          | 10            | 0.6          |
|  | Sum           | 3753        |               | 100.0        |

# LCMS NNAHDI\_0119A

Signal MSD1 TIC, MS File, ES-API, Pos, Scan, Frag: 70, "Pos"

Peak RT 7.054

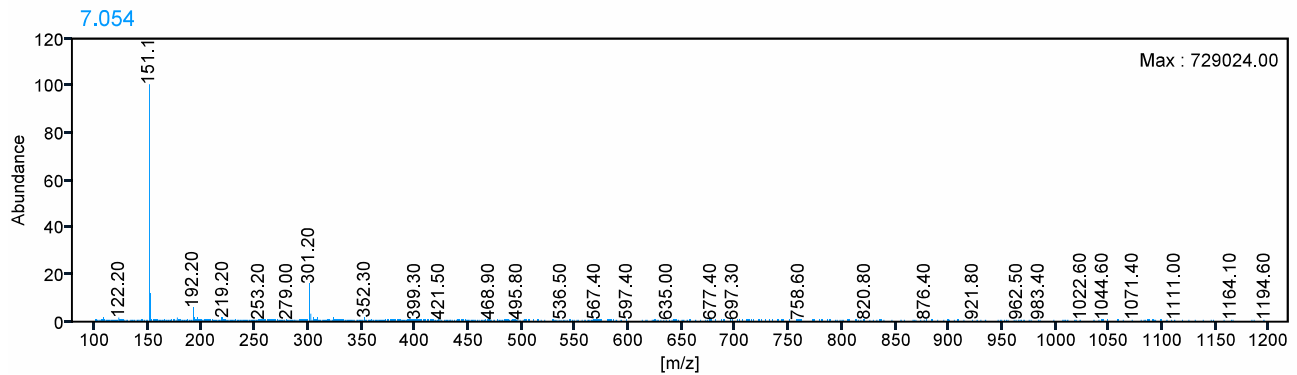

Peak RT 9.145

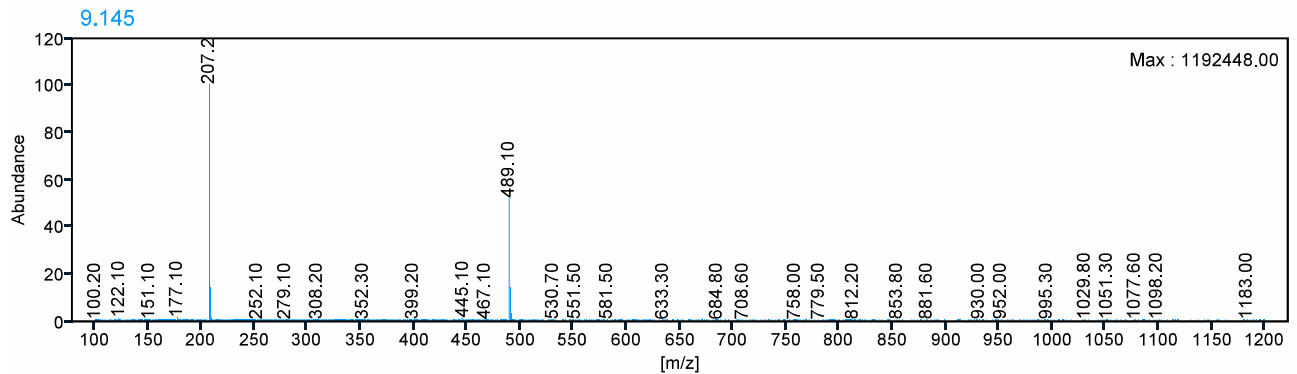

Peak RT 9.305

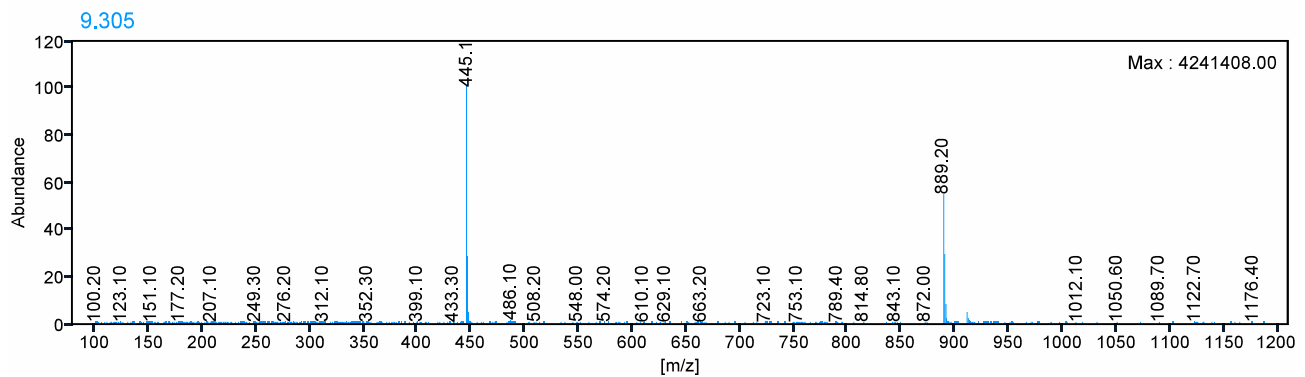

# LCMS NNAHDI\_0119A

Peak RT 9.530

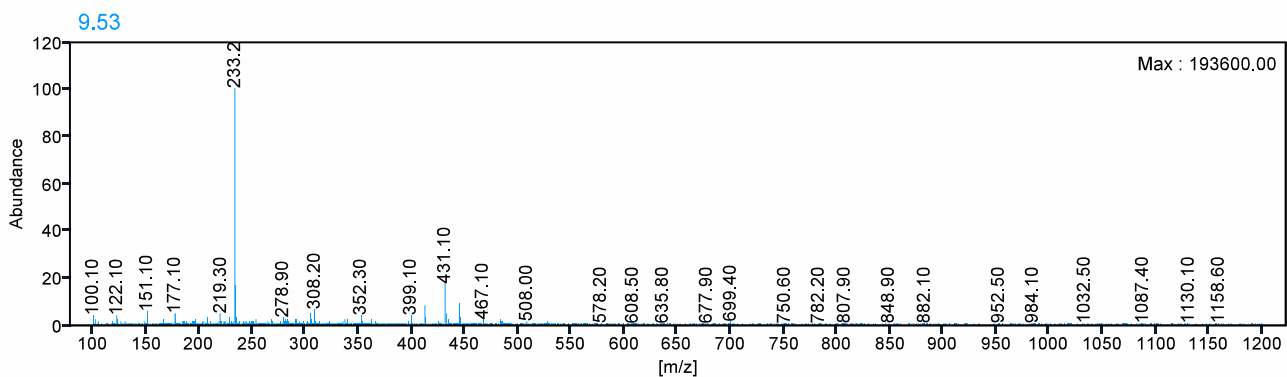

Peak RT 10.223

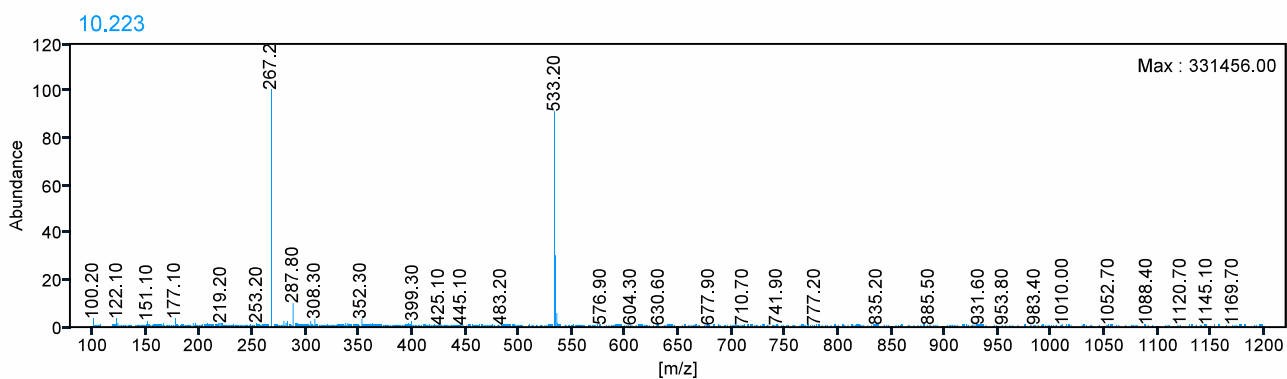

Peak RT 10.640

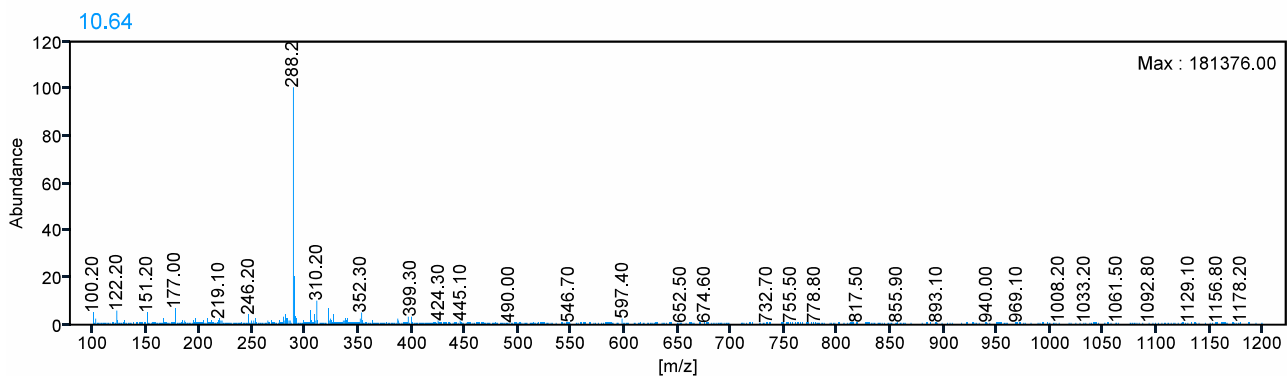

# LCMS NNAHDI\_0119A

Signal MSD2 TIC, MS File, ES-API, Neg, Scan, Frag: 70, "Neg"

Peak RT 9.306

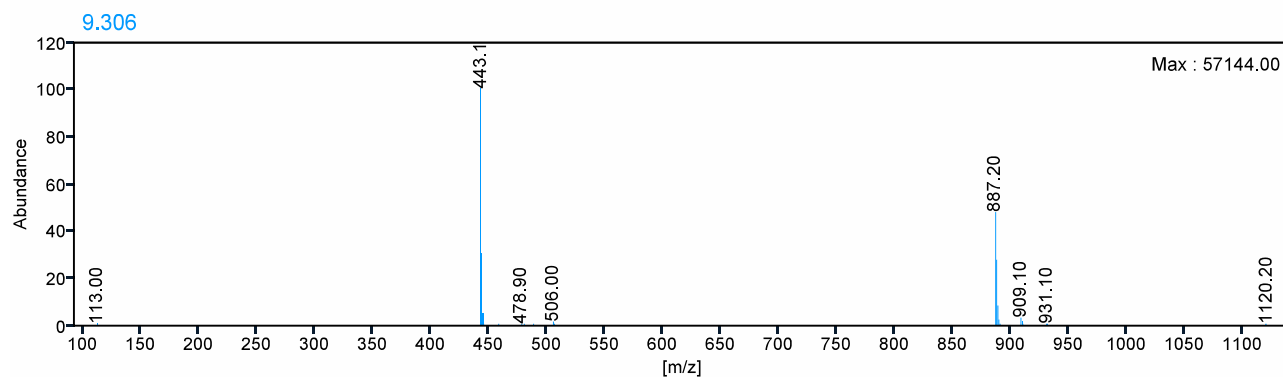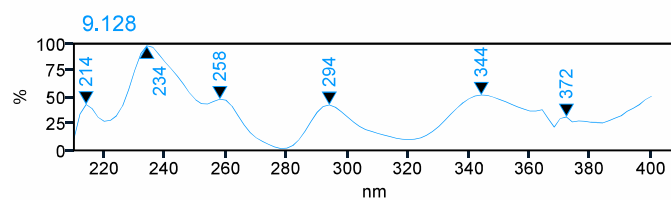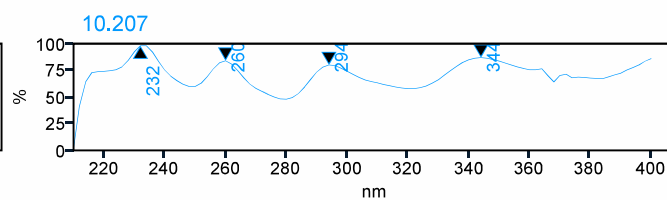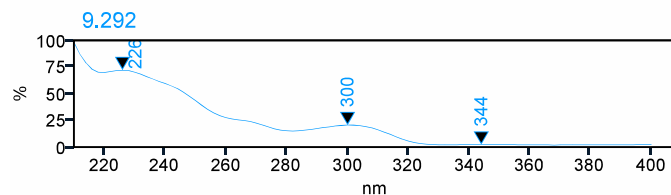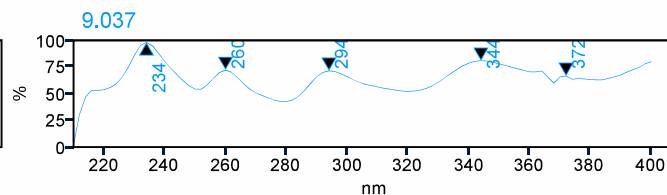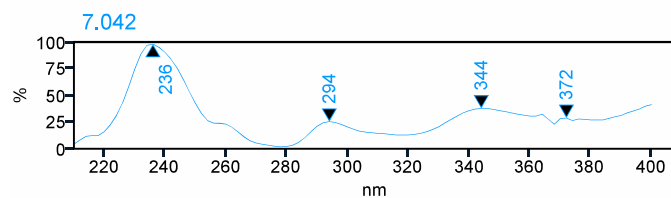

NNAHDI\_0119A (1D 1H) DMSO 500MHz

0.853  
1.072  
1.240

2.206  
2.245  
2.500

3.264  
3.295  
3.313  
3.335  
3.507  
3.640

4.311  
4.342  
4.411  
4.441  
4.677  
4.906  
4.942  
4.969

5.745

6.120  
6.291

7.016  
7.054  
7.072  
7.093  
7.255  
7.272  
7.364  
7.409  
7.426  
7.477  
7.491  
7.530  
8.015  
8.380

8.781  
8.884

11.938  
11.989

ppm

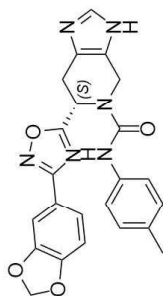

MPOL\_D\_1

3.18

1.10

1.13

1.00

1.08

2.28

1.00

3.11

4.05

1.02

1.04

0.90

ppm
